# Supplementary material for: Characterization of immune responses in fully vaccinated individuals following breakthrough infection with the SARS-CoV-2 delta variant
Source: PubMed Central journal article supplement (PMC8995036; doi:10.1126/scitranslmed.abn6150), 2022-03-08
Supplement: scitranslmed.abn6150_sm.pdf [file scitranslmed.abn6150_sm.pdf]

Supplementary Materials for  
**Characterization of immune responses in fully vaccinated individuals following  
breakthrough infection with the SARS-CoV-2 delta variant**

Ai-ris Y. Collier *et al.*

Corresponding author: Dan H. Barouch, [dbarouch@bidmc.harvard.edu](mailto:dbarouch@bidmc.harvard.edu)

DOI: [10.1126/scitranslmed.abn6150](https://doi.org/10.1126/scitranslmed.abn6150)

**The PDF file includes:**

Figs. S1 to S5  
Tables S1 and S2

**Other Supplementary Material for this manuscript includes the following:**

MDAR Reproducibility Checklist  
Data file S1

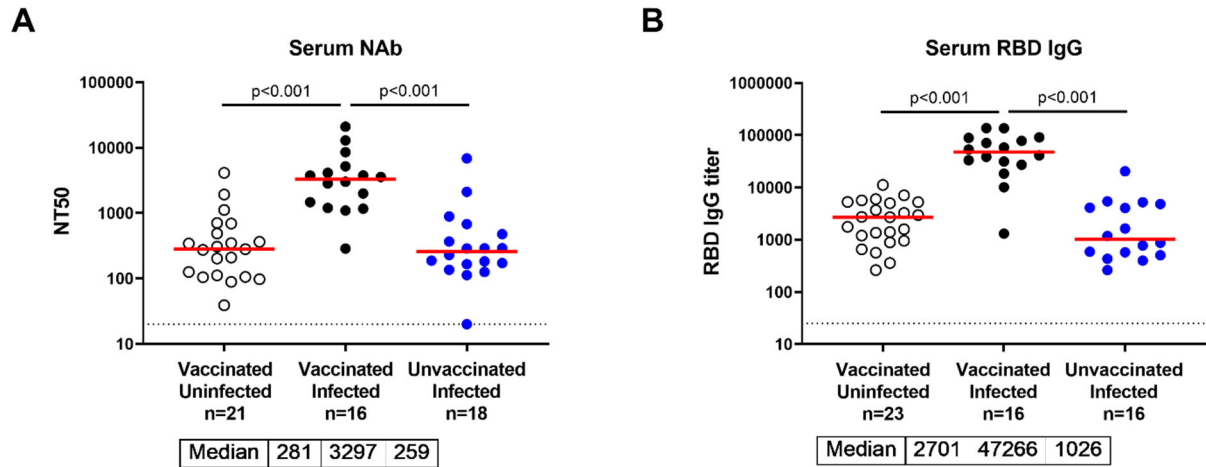

**Fig. S1. Antibody responses in coronavirus disease 2019 (COVID-19) vaccinated individuals and unvaccinated individuals with severe acute respiratory syndrome coronavirus 2 (SARS-CoV-2) infection.**

Serum antibody responses in vaccinated individuals exposed to the SARS-CoV-2 outbreak in Provincetown, Massachusetts (presented in **Fig. 1** of the main text) were compared directly with an unvaccinated early pandemic cohort from Boston. Vaccinated uninfected individuals (open symbols), vaccinated infected (filled black symbols) individuals, and unvaccinated individuals with SARS-CoV-2 infection from the early pandemic (filled blue symbols) are shown. **(A)** Pseudovirus neutralization titers were measured as 50% reduction (NT50) of luciferase expression for the Spike WA1/2020 variant. NAb, neutralizing antibody. **(B)** Enzyme-linked immunosorbent assay (ELISA) IgG titers are shown for the SARS-COV-2 receptor binding domain (RBD) for the WA1/2020 variant. Medians (red bar) for each variant are displayed below the x-axis. The dotted line indicates limit of detection. P values compare two-way unpaired medians titer (Wilcoxon rank-sum test).

**A**

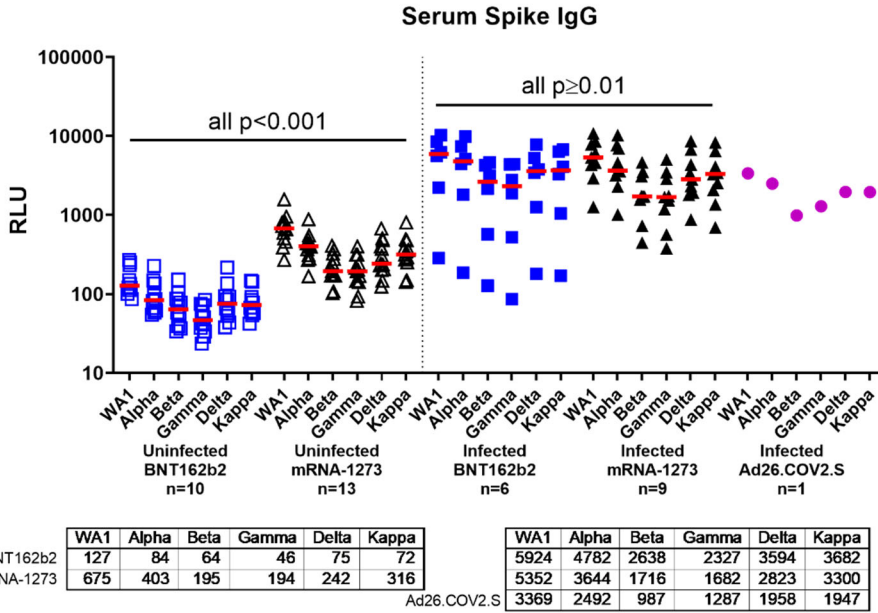

**B**

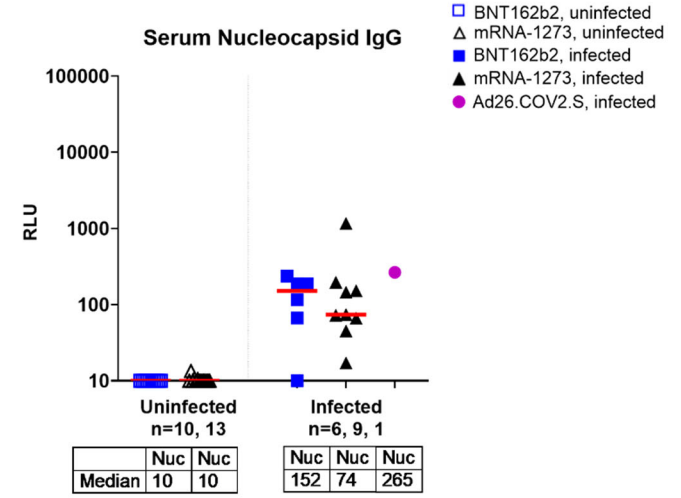

**C**

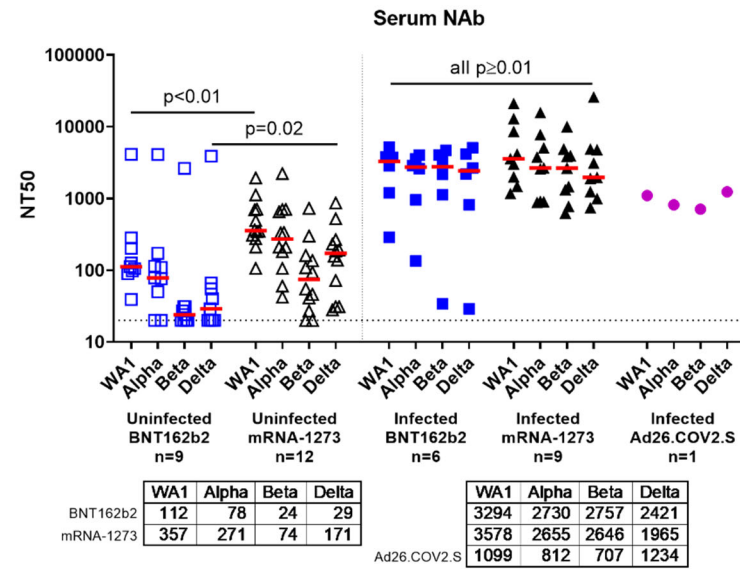

**D**

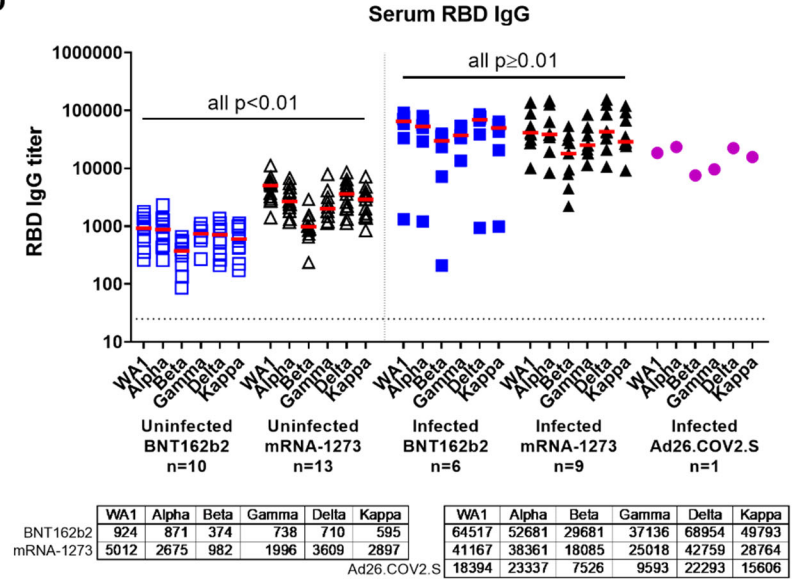

**Fig. S2. Antibody responses in COVID-19 vaccinated individuals with and without confirmed SARS-CoV-2 breakthrough infection, by vaccine type.**

Serum antibody responses were measured in samples from individuals vaccinated with BNT162b2 (blue), mRNA-1273 (black), or Ad26.COVS.S (magenta) as part of the SARS-CoV-2 outbreak investigation in Provincetown, Massachusetts. Vaccinated uninfected (open symbols) and vaccinated infected (filled symbols) individuals are shown. **(A and B)** IgG binding antibody titers measured by multiplexed electrochemiluminescence (ECLA) assays against SARS-CoV-2 Spike from WA1/2020, B.1.1.7 (alpha), B.1.351 (beta), P.1 (gamma), B.1.617.2 (delta), and B.1.617.1 (kappa) variants (A) and against the non-vaccine antigen Nucleocapsid (Nuc) (B) are displayed in relative light units (RLU). **(C)** Pseudovirus neutralization titers were measured as 50% reduction (NT50) of luciferase expression. **(D)** ELISA IgG titers to SARS-COV-2 RBD variants are shown. For all panels, median values (red bar) for each variant are displayed below the x-axis. Dotted line indicates limit of detection. P values (Wilcoxon rank-sum test) compare the Spike protein or Nucleocapsid from the indicated variants between participants who received BNT162b2 and those who received mRNA-1273.

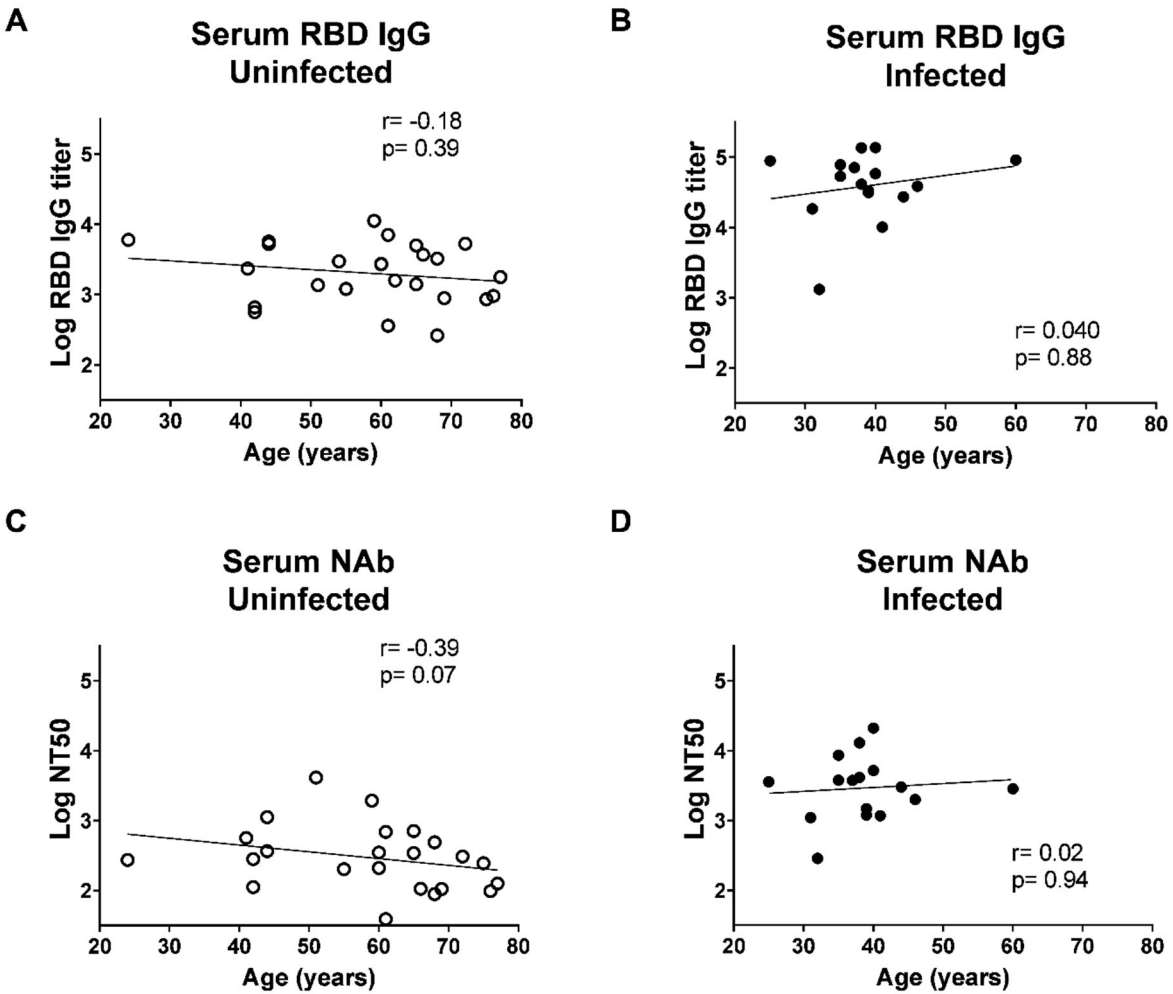

**Fig. S3. RBD-binding serum IgG titer and neutralizing antibody titer by age.**

Serum RBD-specific ELISA IgG titers (**A and B**) and pseudovirus NT50 NAb titers (**C and D**) against WA1/2020 are plotted as a function of age. Vaccinated uninfected (**A, C**) and vaccinated infected (**B, D**) individuals are shown with line of best fit. Spearman correlation ( $r$ ) and  $p$ -values are listed for each plot.

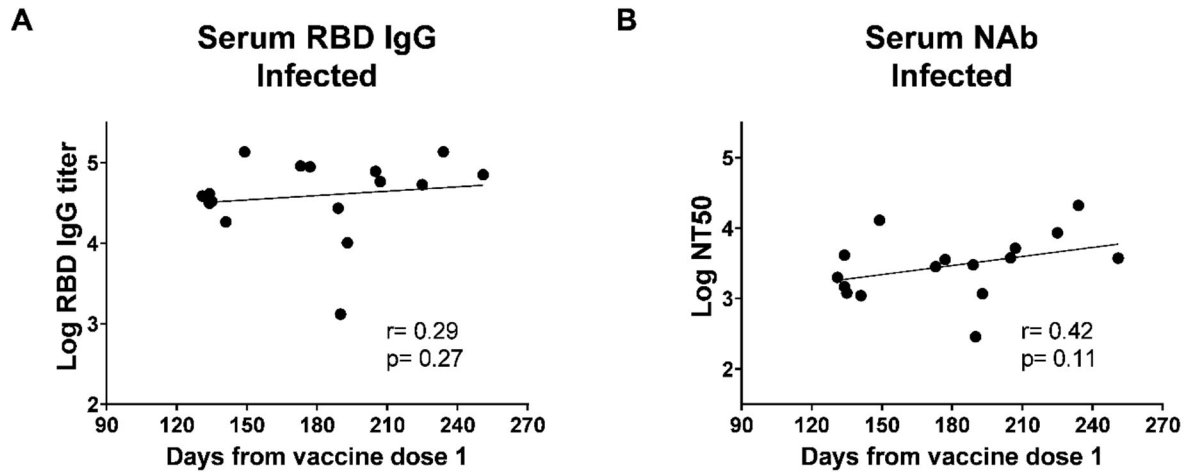

**Fig. S4. Serum RBD-binding IgG titer and neutralizing antibody in vaccinated and infected individuals by days from first COVID-19 vaccine dose.**

(**A and B**) Serum RBD-specific ELISA IgG titer (A) and pseudovirus NT50 neutralizing antibody (NAb) titer (B) against WA1/2020 are plotted against days from first COVID-19 vaccine dose in vaccinated and infected individuals. Data are shown with a line of best fit. Spearman correlation ( $r$ ) and  $p$ -values are listed for each plot.

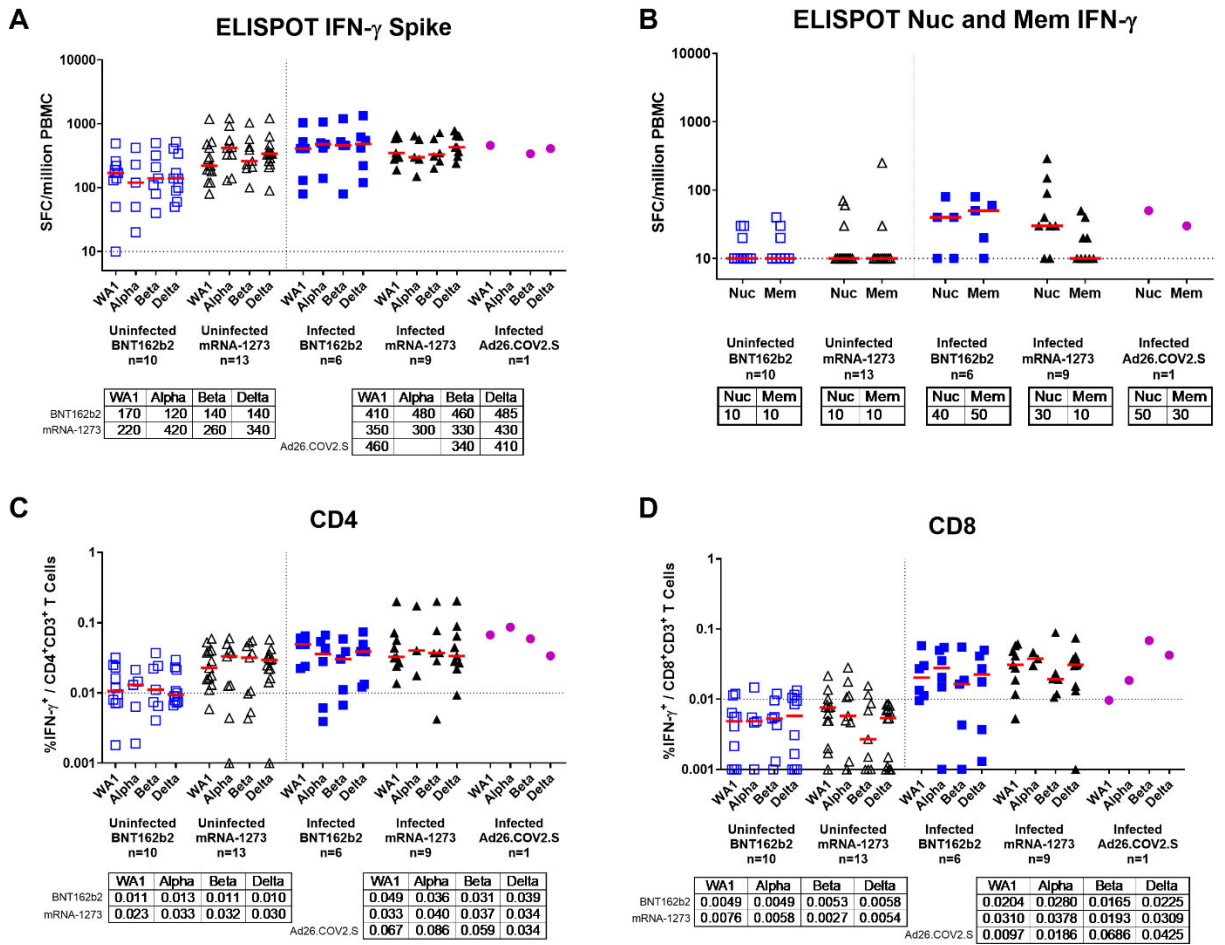

**Fig. S5. T cell responses in COVID-19 vaccinated individuals with and without confirmed SARS-CoV-2 breakthrough infection, by vaccine type.**

(A and B) SARS-CoV-2-specific T cell responses in BNT162b2 (blue), mRNA-1273 (black), and Ad26.COVS.2.S (magenta) vaccinated individuals were measured by interferon (IFN)- $\gamma$  enzyme-linked immune absorbent spot (ELISPOT) assays after stimulation with pooled Spike peptides from WA1/2020 or from variants B.1.1.7 (alpha), B.1.351 (beta), and B.1.617.2 (delta) (A) or non-vaccine antigens Nucleocapsid (Nuc) and Membrane (Mem) (B). Data are presented as spot-forming cells (SFCs) per million peripheral blood mononuclear cells (PBMCs). (C and D) Intracellular cytokine staining (ICS) assays measured percent IFN- $\gamma$  production in CD4 T cells (C)

and CD8 T cells (D) in response to Spike peptides from indicated variants. Vaccinated uninfected (open symbols) and vaccinated infected (filled symbols) individuals are shown. Medians (red bar) for each variant are displayed below the x-axis. Dotted line indicates limit of detection for (A) and (B) and indicates the lower limit of quantitation for (C) and (D).



**Table S1. Characteristics of vaccinated study population**

|                                                        | Vaccinated,<br>infected<br>n=16 | Vaccinated,<br>uninfected<br>n=23 |
|--------------------------------------------------------|---------------------------------|-----------------------------------|
| Age (years), median (IQR)                              | 38 (35 to 40)                   | 61 (52 to 67)                     |
| Sex at birth, female, n (%)                            | 3 (19)                          | 8 (35)                            |
| Race, n (%)                                            |                                 |                                   |
| White                                                  | 13 (81)                         | 23 (100)                          |
| Black                                                  | 0                               | 0                                 |
| Asian                                                  | 1 (6)                           | 0                                 |
| More than one race                                     | 0                               | 0                                 |
| Another race                                           | 1 (6)                           | 0                                 |
| Ethnicity, n (%)                                       |                                 |                                   |
| Hispanic or Latino                                     | 0                               | 1 (4)                             |
| Non-Hispanic                                           | 16 (100)                        | 22 (96)                           |
| Medical condition, n (%)                               |                                 |                                   |
| Pregnant                                               | 0                               | 0                                 |
| Diabetes                                               | 0                               | 2 (9)                             |
| Hypertension                                           | 3 (19)                          | 7 (30)                            |
| Obesity (Body mass index $\geq$ 30 kg/m <sup>2</sup> ) | 3 (19)                          | 2 (9)                             |
| Asthma                                                 | 3 (19)                          | 4 (17)                            |
| COVID19 Vaccine, n (%)                                 |                                 |                                   |
| BNT162b2                                               | 6 (38)                          | 10 (44)                           |
| mRNA-1273                                              | 9 (56)                          | 13 (57)                           |
| Ad26.COV2.S                                            | 1 (6)                           | 0                                 |
| Days from 1st vaccine dose to sampling, median (IQR)   | 183 (137 to 207)                | 191 (158 to 221)                  |
| Days from PCR test to sampling, median (IQR)           | 33 (22 to 42)                   | 35 (29 to 47)                     |
| Symptoms, n                                            | 15                              | 14                                |
| Never symptomatic, n (%)                               | 0                               | 8 (57)                            |
| Respiratory, n (%)                                     | 14 (93)                         | 6 (43)                            |
| Gastrointestinal, n (%)                                | 2 (13)                          | 0                                 |
| Fever, n (%)                                           | 8 (53)                          | 0                                 |
| Sore throat, n (%)                                     | 7 (47)                          | 1 (7)                             |
| Loss of smell or taste, n (%)                          | 13 (87)                         | 0                                 |
| Other, n (%)                                           | 9 (60)                          | 4 (29)                            |
| NIH disease severity, n (%)                            |                                 |                                   |
| Asymptomatic                                           | 1 (6)                           | N/A                               |
| Mild/Moderate                                          | 15 (94)                         | N/A                               |
| Severe/Critical                                        | 0                               | N/A                               |

IQR, interquartile range; PCR= polymerase chain reaction nasopharyngeal testing for SARS-CoV-2; NIH, National Institutes for Health; N/A, not applicable.

**Table S2. Characteristics of unvaccinated cohort**

|                                                        | Unvaccinated,<br>infected<br>n=18 |
|--------------------------------------------------------|-----------------------------------|
| Age (years), median (IQR)                              | 38 (33-43)                        |
| Sex at birth, female, n (%)                            | 16 (89)                           |
| Race, n (%)                                            |                                   |
| White                                                  | 8 (44)                            |
| Black                                                  | 5 (28)                            |
| Asian                                                  | 0                                 |
| More than one race                                     | 0                                 |
| Another race                                           | 5 (18)                            |
| Ethnicity, n (%)                                       |                                   |
| Hispanic or Latino                                     | 2 (11)                            |
| Non-Hispanic                                           | 13 (72)                           |
| Unknown                                                | 3 (17)                            |
| Medical condition, n (%)                               |                                   |
| Pregnant                                               | 10 (56)                           |
| Diabetes                                               | 1 (6)                             |
| Hypertension                                           | 2 (11)                            |
| Obesity (Body mass index $\geq$ 30 kg/m <sup>2</sup> ) | 8 (44)                            |
| Asthma                                                 | 2 (11)                            |
| Days from PCR test to sampling, median (IQR)           | 27 (19-52)                        |
| NIH disease severity, n (%)                            |                                   |
| Asymptomatic                                           | 1 (6)                             |
| Mild/Moderate                                          | 14 (78)                           |
| Severe                                                 | 3 (17)                            |
